# Supplementary material
Source: Springer Nature journal article supplement (https://www.springermedizin.de/resource/supplementary/12879_2011_1985_MOESM1_ESM.pdf/9443512)

Figure 1

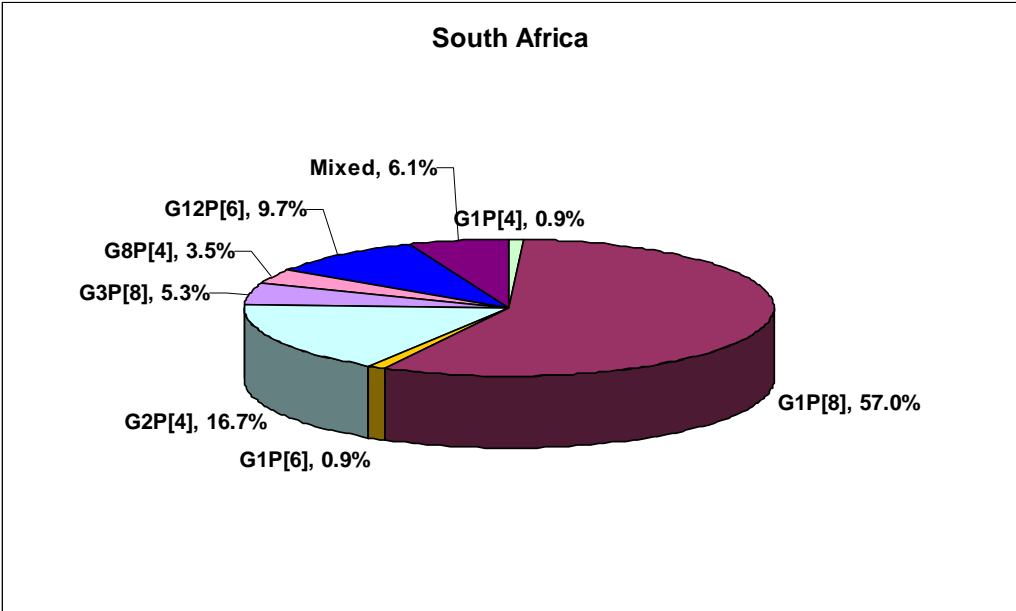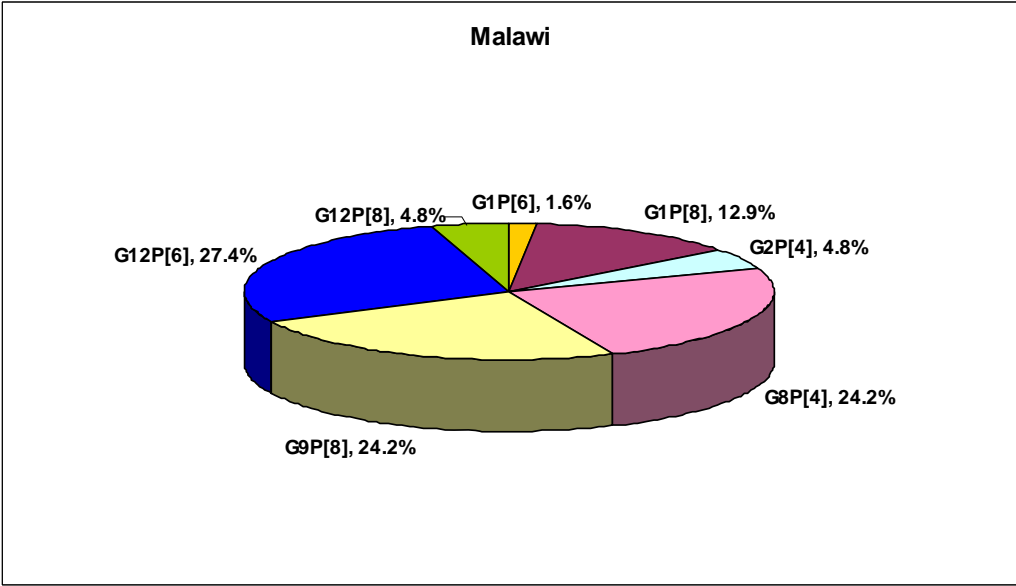

Supplement: MOESM1 [file 9443512]
